# Supplementary material
Source: publisher site journal article supplement (https://www.dovepress.com/article/426199)
Supplement: Supplementary file 1 [file get_supplementary_file.php]

**Supplementary Table 1: Assessment criteria for carving of the maxillary permanent first molar (out of 40)**

| Parameter                                                                                                                                                                                 | Mark allocated         |
|-------------------------------------------------------------------------------------------------------------------------------------------------------------------------------------------|------------------------|
| Overall dimensions                                                                                                                                                                        | 10% = 4points          |
| General appearance                                                                                                                                                                        | 10% = 4points          |
| Location of the mesial and distal contact Areas                                                                                                                                           | 10% = 4points          |
| Mesio-distal locations of the buccal and lingual cusps tips                                                                                                                               | 10% = 4points          |
| Location of the buccal height of contour                                                                                                                                                  | 10% = 2points          |
| Location of the lingual height of contour                                                                                                                                                 | 10% = 2points          |
| Bucco-lingual location of the buccal and lingual cusp tips                                                                                                                                | 10% = 4points          |
| Characteristics and location of mesial and distal marginal ridges                                                                                                                         | 10% = 4points          |
| Characteristics and location of: mesial and distal triangular fossae, triangular ridges, central fossa and developmental groove. Oblique ridge. Transverse ridge. Relative sizes of cusps | 10% = 8 points         |
| Cervical line curvatures, Cusp of Carabelli                                                                                                                                               | 10% = 4points          |
| <b>Total</b>                                                                                                                                                                              | <b>100% = 40points</b> |

**Supplementary Table 2: Assessment criteria for carving of the mandibular permanent first molar (out of 40)**

| Parameter                                                                                                                                                                   | Mark allocated         |
|-----------------------------------------------------------------------------------------------------------------------------------------------------------------------------|------------------------|
| Overall dimensions                                                                                                                                                          | 10% = 4points          |
| General appearance                                                                                                                                                          | 10% = 4points          |
| Location of the mesial and distal contact areas                                                                                                                             | 10% = 4points          |
| Mesio-distal location of the buccal and lingual cusps                                                                                                                       | 10% = 4points          |
| Location of the buccal height of contour, buccal developmental grooves location and existence.                                                                              | 10% = 4points          |
| Location of the lingual height of contour, lingual groove                                                                                                                   | 10% = 4points          |
| Bucco-lingual location of the buccal and lingual cusp tips                                                                                                                  | 10% = 4points          |
| Characteristics and location of mesial and distal marginal ridges.                                                                                                          | 10% = 4points          |
| Characteristics and location of: mesial and distal triangular fossae, triangular ridges, central fossa and developmental groove. Transverse ridge. Relative sizes of cusps. | 10% = 6points          |
| Cervical line curvatures                                                                                                                                                    | 10% = 2points          |
| <b>Total</b>                                                                                                                                                                | <b>100% = 40points</b> |

**Supplementary Table 3: Assessment criteria for carving of the maxillary permanent first premolar (out of 30)**

| <b>Parameter</b>                                                                                                | <b>Mark allocated</b>  |
|-----------------------------------------------------------------------------------------------------------------|------------------------|
| Overall dimensions                                                                                              | 10% = 3points          |
| General appearance                                                                                              | 10% = 3points          |
| Location of the mesial and distal contact points                                                                | 10% = 3points          |
| Mesio-distal location of the buccal cusp tip                                                                    | 10% = 3points          |
| Location of the buccal height of contour                                                                        | 10% = 3points          |
| Location of the lingual height of contour                                                                       | 10% = 3points          |
| Bucco-lingual location of the buccal and lingual cusp tips                                                      | 10% = 3points          |
| Characteristics and location of mesial and distal marginal ridges, and the mesial marginal developmental groove | 10% = 3points          |
| Characteristics and location of mesial and distal triangular fossae, and the central developmental groove       | 10% = 3points          |
| Cervical line curvatures                                                                                        | 10% = 3points          |
| <b>Total</b>                                                                                                    | <b>100% = 30points</b> |

**Supplementary Table 4: Assessment criteria for carving of the mandibular permanent first premolar (out of 30)**

| <b>Parameter</b>                                                                                             | <b>Mark allocated</b>  |
|--------------------------------------------------------------------------------------------------------------|------------------------|
| Overall dimensions                                                                                           | 10% = 3points          |
| General appearance                                                                                           | 10% = 3points          |
| Location of the mesial and distal contact points                                                             | 10% = 3points          |
| Mesio-distal location of the buccal cusp tip                                                                 | 10% = 3points          |
| Location of the buccal height of contour                                                                     | 10% = 3points          |
| Location of the lingual height of contour                                                                    | 10% = 3points          |
| Bucco-lingual location of the buccal and lingual cusp tips                                                   | 10% = 3points          |
| Characteristics and location of mesial and distal marginal ridges, and the mesiolingual developmental groove | 10% = 3points          |
| Characteristics and location of mesial and distal triangular fossae, and the central developmental groove    | 10% = 3points          |
| Cervical line curvatures                                                                                     | 10% = 3points          |
| <b>Total</b>                                                                                                 | <b>100% = 30points</b> |

**Supplementary Table 5: Assessment criteria for carving of the maxillary permanent central incisor (out of 30)**

| <b>Parameter</b>                            | <b>Mark allocated</b>  |
|---------------------------------------------|------------------------|
| Overall dimensions                          | 10% = 3points          |
| General appearance                          | 10% = 3points          |
| Location of the mesial contact point        | 10% = 3points          |
| Location of the distal contact point        | 10% = 3points          |
| Location of the labial height of contour    | 10% = 3points          |
| Location of the lingual height of contour   | 10% = 3points          |
| Lingual fossa and marginal ridges           | 10% = 3points          |
| Labio-lingual location of the incisal ridge | 10% = 3points          |
| Thickness of the incisal ridge              | 10% = 3points          |
| Cervical line curvatures                    | 10% = 3points          |
| <b>Total</b>                                | <b>100% = 30points</b> |

**Supplementary Table 6: Assessment criteria for carving of the maxillary permanent canine (out of 30)**

| <b>Parameter</b>                                  | <b>Mark allocated</b>  |
|---------------------------------------------------|------------------------|
| Overall dimensions                                | 10% = 3points          |
| General appearance                                | 10% = 3points          |
| Location of the mesial contact point              | 10% = 3points          |
| Location of the distal contact point              | 10% = 3points          |
| Location of the labial height of contour          | 10% = 3points          |
| Location of the lingual height of contour         | 10% = 3points          |
| Lingual fossae and marginal ridges                | 10% = 3points          |
| location of the cusp tip                          | 10% = 3points          |
| Concavity on the distal half of the labial aspect | 10% = 3points          |
| Cervical line curvatures                          | 10% = 3points          |
| <b>Total</b>                                      | <b>100% = 30points</b> |
